# Supplementary material for: Anomalous amide proton chemical shifts as signatures of hydrogen bonding to aromatic sidechains
Source: PubMed Central journal article supplement (PMC10539802; doi:10.5194/mr-2-765-2021), 2021-10-25
Supplement: mr-2-765-supplement.pdf [file mr-2-765-supplement.pdf]

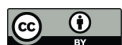

*Supplement of*

## **Anomalous amide proton chemical shifts as signatures of hydrogen bonding to aromatic sidechains**

**Kumaran Baskaran et al.**

*Correspondence to:* Jeffrey C. Hoch (hoch@uchc.edu)

The copyright of individual parts of the supplement might differ from the article licence.

| Reason for Exclusion                                                   | # Excluded | Examples (BMRB ID, PDB ID)                                                                           |
|------------------------------------------------------------------------|------------|------------------------------------------------------------------------------------------------------|
| DNA/RNA entries, entries with ligands, oligomers and protein complexes | 1767       | (50411, 7JK8)                                                                                        |
| Severe residue index mismatch between PDB and BMRB                     | 1199       | (50842, 7MC3)                                                                                        |
| Restraint file not in ReBoxitory                                       | 716        | (36368, 7CQ1)                                                                                        |
| No distance restraints in restraints file                              | 190        | (50264, 6Z0H)                                                                                        |
| No aromatic residues in sequence                                       | 152        | (50202, 6YFY)                                                                                        |
| >3500 distance restraints *                                            | 151        | (36176, 5ZMR)                                                                                        |
| Restrained amide-aromatic pairs > 8Å apart *                           | 136        | (36008, 5GHD)                                                                                        |
| Unable to match residues from structure to restraints                  | 99         | (36097, 5XR1)                                                                                        |
| mmCIF file not in ReBoxitory                                           | 18         | (50886, 7MLL)                                                                                        |
| STR file not in ReBoxitory                                             | 7          | (36326, 6M6K)                                                                                        |
| Empty restraint file                                                   | 3          | (25068, 2MRC)                                                                                        |
| Misformatted restraint file                                            | 3          | (4540, 1NLA)                                                                                         |
| Miscellaneous                                                          | 7          | (2NBN, 25984), (2M7V, 19214), (2LK9, 17985), (2KSI, 16665), (1SF0, 6187), (1RFH, 6059), (1P9F, 5864) |

**Table S1:** Reasons for the exclusion of BMRB/PDB entries from the analysis. Most reasons make analysis difficult (e.g. index mismatches) or impossible (e.g. no restraint file). Reasons with a \* were implemented to maintain quality. An entry having > 3500 distance restraints or restraints between amide-aromatic pairs that were > 8 Å apart was in some cases indicative of deeper problems with the restraint assignments, such as restraints being assigned between all atoms.
